## **Molecular Characterization in 3D Structure of MicroRNA Expressed in Leprosy**

### **Luís Jesuino de Oliveira Andrade**

Health Department State University of Santa Cruz, Ilhéus – Bahia – Brazil.

<https://orcid.org/0000-0002-7714-0330>

### **Humberto Barreto de Jesus**

Fundação Nacional de Saúde – Itabuna – Bahia – Brazil.

### **Luís Matos de Oliveira**

Faculdade de Medicina –Bahia –Brazil. <https://orcid.org/0000-0003-4854-6910>

### **Moema Farias de Oliveira**

Secretaria de Saúde – Itabuna – Bahia – Brazil.

### **Laura Farias Caricchio Santana**

Faculdade de Medicina Uni-FTC – Salvador – Bahia – Brazil

### **Gabriela Correia Matos de Oliveira**

Faculdade de Medicina Uni-FTC – Salvador – Bahia – Brazil. <https://orcid.org/0000-0002-8042-0261>

### **Corresponding Author:**

Luís Jesuino de Oliveira Andrade

Departamento de Ciências da Saúde

Universidade Estadual de Santa Cruz – UESC – Ilhéus – Bahia,

e-mail: [luis\\_jesuino@yahoo.com.br](mailto:luis_jesuino@yahoo.com.br)

**Competing interests:** no potential conflict of interest relevant to this article was reported.

## **ABSTRACT**

**Introduction:** Hansen's disease, or leprosy, is a major public health problem in developing countries, caused by *Mycobacterium leprae*, and affecting the skin and peripheral nerves. However, *M. leprae* can also affect bone tissue, mucous membranes, liver, eyes, and testicles, producing a variety of clinical phenotypes. MicroRNAs (miRNAs) have been expressed in the various clinical forms of leprosy and could potentially be used for its diagnosis.

**Objective:** *In silico* design of the molecular structure of miRNAs expressed in leprosy.

**Method:** We performed a nucleotide sequence search of 17 miRNAs expressed in leprosy, designing *in silico* the molecular structure of the following miRNAs: miRNA-26a, miRNA-27a, miRNA-27b, miRNA-29c, miRNA-34c, miRNA-92a-1, miRNA-99a-2, miRNA-101-1, miRNA-101-2, miRNA-125b-1, miRNA-196b, miRNA-425-5p, miRNA-452, miRNA-455, miRNA-502, miRNA-539, and miRNA-660. We extracted the nucleotides were from the GenBank of National Center for Biotechnology Information genetic sequence database. We aligned the extracted sequences with the RNA Folding Form, and the three-dimensional molecular structure design was performed with the RNAComposer.

**Results:** We demonstrate the nucleotide sequences, and molecular structure projection of miRNAs expressed in leprosy, and produces a tutorial on the molecular model of the 17 miRNAs expressed in leprosy through *in silico* projection processing of their molecular structures.

**Conclusion:** We demonstrate *in silico* design of selected molecular structures of 17 miRNAs expressed in leprosy through computational biology.

**Keywords:** Leprosy; MicroRNA; Molecular structure.

## INTRODUCTION

Hansen's disease, or leprosy, is a major public health problem in developing countries, caused by *Mycobacterium leprae* (*M. leprae*), and affecting the skin and peripheral nerves. However, *M. leprae* can also affect bone tissue, mucous membranes, liver, eyes, and testicles, producing a variety of clinical phenotypes.<sup>1</sup> About 200,000 new cases were reported in 2017 from almost 150 countries, and migration due to globalization tends to expand the number of cases bringing leprosy to countries where leprosy is not endemic.<sup>2</sup>

Leprosy diagnosis is reasoned on the type and number of lesions, nerve commitment, bacillary load, and histopathology exam. Thus, the bacilloscopy and biopsy of skin from an active lesion, it is considered as “gold standard” in leprosy diagnosis.<sup>3</sup>

The miRNAs has between 19 and 25 nucleotides and are short noncoding RNAs that intervene in post-transcription command of gene manifestation in multicellular beings changing the stableness in system of translation, and consequently miRNAs degradation or inactivation.<sup>4</sup>

MicroRNAs (miRNAs) are relevant elements for host-pathogen interconnection and have been recognized as biological markers of several infectious diseases. Recent information demonstrate that the *M. leprae* controls the miRNA configuration at the leprosy lesion site interfering with host antimicrobial response.<sup>5</sup>

Studies and understanding about the function and structure of miRNAs have grown exponentially in recent years. In particular, the use of bioinformatics, with careful examination of nucleotide sequences providing essential elements for molecular patterning. This study aims to construct computationally the molecular structure of 17 miRNAs expressed in leprosy, and to produce a tutorial of their modeling.

## METHODS

We performed a nucleotide sequence search of 17 miRNAs expressed in leprosy, performing *in silico* molecular structure design of the most expressed miRNAs in leprosy lesions based on literature review studies: miRNA-26a, miRNA-27a, miRNA-27b, miRNA-29c, miRNA-34c, miRNA-92a-1, miRNA-99a-2, miRNA-101-1, miRNA-101-2, miRNA-125b, miRNA-196b, miRNA-425, miRNA-452, miRNA-455, miRNA-502, miRNA-539, and miRNA-660.

We rescued the nucleotides from the GenBank of National Center for Biotechnology Information genetic sequence database (<https://www.ncbi.nlm.nih.gov/>). We aligned the extracted sequences with the RNA Folding Form (<http://www.unafold.org/>), and the three-dimensional molecular structure design was performed with the RNAComposer (<https://rnacomposer.cs.put.poznan.pl/>), as employed to design the molecular configurations. We proceeded with the development of a tutorial on the molecular model of the 17 miRNAs described above by performing *in silico* their molecular arrangement.

### *Nucleotide search and sequence analysis*

GenBank is public domain nucleotide sequence assessment software accessible through the electronic address: <https://www.ncbi.nlm.nih.gov/genbank/submit/>. The GenBank disposes of numerous nucleotide research algorithms and a great diversity of nucleotide algorithms can be used to investigate the different databases of distinct sequences. Furthermore, GenBank possesses the Nucleotide, Genome Survey Sequence (GSS) and the Expressed Sequence Tag (EST) including nucleic acid sequences. The

references contained are derived from the distribution of the number of sequences from GenBank

### ***Molecular model construction***

The function and constitution of amino acids and proteins are composed of nucleotide sequences and structure forecast until then is a significant problem, with a vast search for high-resolution structure methods.

Modeling by homology is at present the most precise method computational method to produce trustworthy structural models and is generally utilized in numerous biological uses.

### ***Designing the structure of RNA***

The RNAComposer system presents an interactive proposal for the fully automated prediction of RNA three-dimensional (3-D) structures. The system is based on the precept of automatic translation and works on the RNA FRABASE database as the dictionary concerning the secondary structure of the RNA and the components of the tertiary structure.

RNAComposer works interactively, allowing you to work with an RNA molecule of up to 500 nucleotide residues, resulting in only one model of the RNA three-dimensional structure. Batch mode, on the other hand, is designed for automated modeling of RNA structures of up to 500 nucleotide residues, and up to 10 RNAs sequences can be used. The RNAComposer package is free of charge available for public use and download, from homepage at: <https://rnacomposer.cs.put.poznan.pl/>.

## **RESULTS**

We showed a search for nucleotide sequence and the drawing of molecular structure of following miRNA expressed in lesions due to leprosy: miR-26a, miR-27a, miR-27b, miR-29c, miR-34c, miR-92a-1, miR-99a-2, miR-101-1, miR-101-2, miR-125b-1, miR-196b, miR-425, miR-452, miR-455-3p, miR-502-3p, miR-539, and miR-660. We produced a tutorial on molecular model of the 17 miRNAs expressed in lesions due to leprosy through of processing *in silico* projection of their molecular structures.

### ***Nucleotide sequence of miRNA-26a***

To construct the structure of miRNA-26a-1 the nucleotide sequences with the NCBI identifier code: AJ421747. were used under the FASTA format obtained from GenBank. The Homo sapiens microRNA miR-26a was planned to encode a 22 bp linear ncRNA. Homo sapiens microRNA 26a (MIR26A), microRNA analysis is demonstrated in Figure 1.

#### **Homo sapiens microRNA miR-26a**

GenBank: AJ421747.1



**Figure 1.** Homo sapiens microRNA miR-26a - *model-template alignment*.

**Source:** <https://www.ncbi.nlm.nih.gov/nuccore/AJ421747.1?report=graph>

### ***Molecular model of miRNA-26a***

Nucleotide sequences of Homo sapiens microRNA 26a (MIR26A) were acquired employing FASTA format sequence: UUCAAGUAAUCCAGGAUAGGCU and secondary structure: ....(((.....)))..)); modeling was performed employing the RNAComposer, optimized and adjusted for alignment between structural templates and miRNA-26a nucleotide. Based on sequence alignment between the template structure and miRNA-26a nucleotide, a structural model was built for the nucleotide in question. So, employing RNAComposer of comparative nucleotide modeling we generated a homology model of microRNA 26a (MIR26A), demonstrated in Figure 2 with CPK spacefill style structure in pdb format.







between structural templates and microRNA 27b nucleotide. Based on sequence alignment between the template structure and microRNA nucleotide, a structural model was built for the nucleotide in question. So, employing RNAComposer of comparative nucleotide modeling we generated a homology model of Homo sapiens microRNA 27b (MIR27B), demonstrated in Figure 6 with CPK spacefill style structure in pdb format.



**Figure 6.** Homology model of the Homo sapiens microRNA 27b (MIR27B)  
**Source:** <https://macomposer.cs.put.poznan.pl/>

### *Nucleotide sequence of miRNA-29c*

The reconstruction of miRNA-29c was performed from a nucleotide sequence archive in FASTA format obtained in GenBank database with the identifier code NCBI Reference Sequence: NR\_029832.1. The miRNA-29c was planned to encode a 88 bp linear ncRNA. All coded sequences selected in FASTA format, used the annotation of the NCBI - Graphics - Homo sapiens microRNA 29c (MIR29C). The microRNA-29c analysis is shown in Figure 7.

### **Homo sapiens microRNA 29c (MIR29C), microRNA**

NCBI Reference Sequence: NR\_029832.1



**Figure 7.** Homo sapiens microRNA 29c (MIR29C), microRNA - *model-template alignment*.

**Source:** [https://www.ncbi.nlm.nih.gov/nuccore/NR\\_029832.1?report=graph](https://www.ncbi.nlm.nih.gov/nuccore/NR_029832.1?report=graph)













the structural template for microRNA-101-1 was produced. Assessment tools were used para measure the reliability of the designed structure. Thereby, using the RNAComposer comparative nucleotide modeling server, we generate a homology model of the Homo sapiens microRNA 101-1 (MIR101-1), microRNA with Cartoon-style structure in pdb format (Figure 16).



**Figure 16.** Homology model of the Homo sapiens microRNA 101-1 (MIR101-1), microRNA

**Source:** <https://rnacomposer.cs.put.poznan.pl/>

### ***Nucleotide sequence of miRNA-101-2***

To construct the structure of miRNA-101-2 the nucleotide sequences with the NCBI identifier code: NR\_029836.1 were used under the FASTA format obtained from GenBank. The miRNA-101-2 was planned to encode a 79 bp linear ncRNA. Homo sapiens microRNA 101-2 (MIR101-2), microRNA analysis is presented at Figure 17.

#### **Homo sapiens microRNA 101-2 (MIR101-2), microRNA**

NCBI Reference Sequence: NR\_029836.1



**Figure 17.** Homo sapiens microRNA 101-2 (MIR101-2), microRNA - *model-template alignment*.

**Source:** [https://www.ncbi.nlm.nih.gov/nuccore/NR\\_029836.1?report=graph](https://www.ncbi.nlm.nih.gov/nuccore/NR_029836.1?report=graph)

### ***Molecular model of miRNA-101-2***

Nucleotide sequences of Homo sapiens microRNA 101-2 (MIR101-2) were acquired employing FASTA format sequence: ACUGUCCUUUUUCGGUUAUCAUGGUACCGAUGCUGUAUAUCUGAAAGGU







### ***Nucleotide sequence of miRNA-196b***

To construct the structure of miRNA-196b the nucleotide sequences with the NCBI identifier code: NR\_029911.1 were used under the FASTA format obtained from GenBank. The miRNA-196b was planned to encode a 84 bp linear ncRNA. Homo sapiens microRNA 196b (MIR196B), microRNA analysis is demonstrated in Figure 21.

#### **Homo sapiens microRNA 196b (MIR196B), microRNA**

NCBI Reference Sequence: NR\_029911.1



**Figure 21.** Homo sapiens microRNA 196b (MIR196B), microRNA - *model-template alignment*.

**Source:** [https://www.ncbi.nlm.nih.gov/nuccore/NR\\_029911.1?report=graph](https://www.ncbi.nlm.nih.gov/nuccore/NR_029911.1?report=graph)

### ***Molecular model of microRNA 196b***

Nucleotide sequences of Homo sapiens microRNA 196b (MIR196B) were acquired employing FASTA format sequence: ACUGGUCGGUGAUUUAGGUAGUUUCCUGUUGUUGGGAUCCACCUUUCUC UCGACAGCACGACACUGCCUUCAUUCUUCAGUUG, and secondary structure: ((((((.....))))))..; modeling was performed employing the RNAComposer, optimized and adjusted for alignment between structural templates and microRNA 196b nucleotide. Based on sequence alignment between the template structure and microRNA nucleotide, a structural model was built for the nucleotide in question. So, employing RNAComposer of comparative nucleotide modeling we generated a homology model of Homo sapiens microRNA 196b (MIR196B), microRNA, with CPK spacefill style structure in pdb format demonstrated in Figure 22.



**Figure 22.** Homology model of the Homo sapiens microRNA 196b (MIR196B), microRNA

**Source:** <https://macomposer.cs.put.poznan.pl/>

### *Nucleotide sequence of miRNA-425*

The reconstruction of miRNA-425 was performed from a nucleotide sequence archive in FASTA format obtained in GenBank database with the identifier code NCBI Reference Sequence: NR\_029948.1. The miRNA-425 was planned to encode a 87 bp linear ncRNA. All coded sequences selected in FASTA format, used the annotation of the NCBI - Graphics - Homo sapiens microRNA 425 (MIR425), microRNA. The microRNA-425 analysis is shown in Figure 23.

#### **Homo sapiens microRNA 425 (MIR425), microRNA**

NCBI Reference Sequence: NR\_029948.1



**Figure 23.** Homo sapiens microRNA 425 (MIR425), microRNA - *model-template alignment*.

**Source:** [https://www.ncbi.nlm.nih.gov/nuccore/NR\\_029948.1?report=graph](https://www.ncbi.nlm.nih.gov/nuccore/NR_029948.1?report=graph)

### *Molecular model of microRNA-425*

Based on the sequence alignment between the Homo sapiens microRNA 425 nucleotide sequence:

GAAAGCGCUUUGGAAUGACACGAUCACUCCCGUUGAGUGGGCACCCGAGA  
AGCCAUCGGGAAUGUCGUGUCCGCCAGUGCUCUUUC, and secondary

structure: ((((((.....((.....)))..))))).))))), and the

template structure, the structural template for microRNA-425 was produced.

Assessment tools were used para measure the reliability of the designed structure. Thereby, using the RNAComposer comparative nucleotide modeling server, we generate a homology model of the Homo sapiens microRNA 425, with Cartoon-style structure in pdb format (Figure 24).



**Figure 24.** Homology model of the Homo sapiens microRNA 425 (MIR425), microRNA

**Source:** <https://macomposer.cs.put.poznan.pl/>

### ***Nucleotide sequence of miRNA-452***

To construct the structure of miRNA-452 the nucleotide sequences with the NCBI identifier code: NR\_029973.1 were used under the FASTA format obtained from GenBank. The miRNA-452 was planned to encode a 85 bp linear ncRNA. Homo sapiens microRNA 452 (MIR452), microRNA analysis is demonstrated in Figure 25.

#### **Homo sapiens microRNA 452 (MIR452), microRNA**

NCBI Reference Sequence: NR\_029973.1



**Figure 25.** Homo sapiens microRNA 452 (MIR452), microRNA - *model-template alignment*.

**Source:** [https://www.ncbi.nlm.nih.gov/nucleotide/NR\\_029973.1?report=graph](https://www.ncbi.nlm.nih.gov/nucleotide/NR_029973.1?report=graph)

### ***Molecular model of miRNA-452***

Nucleotide sequences of Homo sapiens microRNA 452 (MIR452) were acquired employing FASTA format sequence: GCUAAGCACUUACAACUGUUUGCAGAGGAAACUGAGACUUUGUAACUAU UCUCAGUCUCAUCUGCAAAGAAGUAAGUGCUUUGC, and secondary structure:(((.....((((((((.....((((((((.....)))))))))).....)))))).....); modeling was performed employing the RNAComposer, optimized and adjusted for alignment between structural templates and miRNA-452 nucleotide. Based on sequence alignment between the template structure and miRNA-452 nucleotide, a structural model was built for the nucleotide in question. So, employing RNAComposer of comparative nucleotide modeling we generated a homology model of microRNA 452 (MIR452), with CPK spacefill style structure in pdb format demonstrated in Figure 26.



**Figure 26.** Homology model of the Homo sapiens microRNA 452 (MIR452), microRNA

**Source:** <https://macomposer.cs.put.poznan.pl/>

### ***Nucleotide sequence of miRNA-455***

The reconstruction of miRNA-455 was performed from a nucleotide sequence archive in FASTA format obtained in GenBank database with the identifier code NCBI Reference Sequence: NR\_030255.1. The miRNA-455 was planned to encode a 96 bp linear ncRNA. All coded sequences selected in FASTA format, used the annotation of the NCBI - Graphics. The Homo sapiens microRNA 455 (MIR455), microRNA analysis is shown in Figure 27.

### Homo sapiens microRNA 455 (MIR455), microRNA

NCBI Reference Sequence: NR\_030255.1



**Figure 27.** Homo sapiens microRNA 455 (MIR455), microRNA - *model-template alignment*.

**Source:** [https://www.ncbi.nlm.nih.gov/nucleotide/NR\\_030255.1?report=graph](https://www.ncbi.nlm.nih.gov/nucleotide/NR_030255.1?report=graph)

### *Molecular model of microRNA-455*

Based on the sequence alignment between the Homo sapiens microRNA 455 nucleotide sequence: UCCCUGGCGUGAGGGUAUGUGCCUUUGGACUACAUCGUGGAAGCCAGCAC CAUGCAGUCCAUGGGCAUAUACACUUGCCUCAAGGCCUAUGUCAUC, and secondary structure: .....(((.....)))).)))))).....), and the template structure, the structural template for microRNA 455 was produced. Assessment tools were used para measure the reliability of the designed structure. Thereby, using the RNAComposer comparative nucleotide modeling server, we generate a homology model of the Homo sapiens microRNA 455 (MIR455), microRNA with Cartoon-style structure in pdb format (Figure 28).



**Figure 28.** Homology model of the Homo sapiens microRNA 455 (MIR455), microRNA.

**Source:** <https://rnacomposer.cs.put.poznan.pl/>

### *Nucleotide sequence of miRNA-502*

To construct the structure of miRNA-502 the nucleotide sequences with the NCBI identifier code: NR\_030226.1 were used under the FASTA format obtained from









between structural templates and miRNA-660 nucleotide. Based on sequence alignment between the template structure and miRNA-660 nucleotide, a structural model was built for the nucleotide in question. So, employing RNAComposer of comparative nucleotide modeling we generated a homology model of Homo sapiens microRNA 660 (MIR660), microRNA, demonstrated in Figure 34.



**Figure 34.** Homology model of the Homo sapiens microRNA 660 (MIR660), microRNA.

**Source:** <https://rnacomposer.cs.put.poznan.pl/>

## DISCUSSION

miRNAs have been expressed in a number of infectious and contagious diseases, and have been proposed as potential diagnostic, prognostic and therapeutic markers in leprosy. It has been shown that *M. leprae*, controls in dysregulation of miRNAs at the site of the infectious lesion in leprosy patients and participating in the host therapeutic response.<sup>6</sup>

The miRNAs are short noncoding RNAs that intervene in post-transcription command of gene manifestation in multicellular beings, controlling role in multiples physiological and pathophysiological functions. Studies and the comprehension about the function and structure of miRNAs have grown significantly in recent years. Our study presents a tutorial on molecular modeling and demonstrates *in silico* the projection of the molecular structure of 17 miRNAs expressed in leprosy, drawing *in silico* their molecular structures.

Leprosy is a chronic infectious disease which has as etiologic agent *M. leprae*, being a public health problem in the American, African and Asian continents, especially in developing countries and especially in poor countries.<sup>7</sup> *M. leprae* is an intracellular bacillus which has a long incubation time, slow proliferation, and peripheral nerve

tropism. Leprosy has three distinct forms, tuberculoid, lepromatous and an intermediate form.<sup>8</sup>

. Various microRNAs and their target genes participate of tissue damage in leprosy, and based on literature review studies, we address the following miRNAs most frequently expressed in the leprosy lesion: miRNA-26a, miRNA-27a, miRNA-27b, miRNA-29c, miRNA-34c, miRNA-92a-1, miRNA-99a-2, miRNA-101-1, miRNA-101-2, miRNA-125b, miRNA-196b, miRNA-425, miRNA-452, miRNA-455, miRNA-502, miRNA-539, and miRNA-660.

The combination of several miRNAs as biomarkers is considered as a more efficient option due to the possible overlap in miRNA targeting.<sup>9</sup> The combination of 17 miRNAs evaluated in a study comparing normal individuals with individuals with leprosy showed 80% sensitivity and 91% specificity in discriminating between leprosy and healthy individuals indicating a high diagnostic potency of the miRNAs described above.<sup>10</sup>

With the advancement of bioinformatics several tools have been developed for each step of miRNA biogenesis, helping researchers in molecular biology investigations. Bioinformatics tools for miRNAs design have been showing accessibility for experimental evaluations and structure definitions. The computational study of miRNAs is fundamentally based on the performance analysis of their primary and secondary structures. Reviewing the available literature, we found no studies with the *in silico* construction of miRNA-26a, miRNA-27a, miRNA-27b, miRNA-29c, miRNA-34c, miRNA-92a-1, miRNA-99a-2, miRNA-101-1, miRNA-101-2, miRNA-125b, miRNA-196b, miRNA-425, miRNA-452, miRNA-455, miRNA-502, miRNA-539, and miRNA-660 with a 3-D structure model.

An alternative method using three dimensions (3D) graphical presentation of secondary structures of miRNAs is a promising method as it creates data matrices based on structural information. In our study, the sequence analysis of selected miRNAs was evaluated and 3D structural models were designed. The nucleotide analysis of miRNAs was performed in FASTA format, and the 3D structuring was performed using RNAComposer. Thus, to construct the 3D structural models of the miRNAs, a strategy of structural analysis by homology with the sequence from the Nucleotide database was used. The use of molecular models can promote progress in the development of new drugs that facilitate therapy in target organs.

## CONCLUSION

We demonstrate *in silico* design of selected molecular structures of 17 miRNAs expressed in leprosy through computational biology.

The function and structure of miRNAs are determined by nucleotide sequences and methods for the early knowledge of these structures can allow the identification and the localization of binding sites on nucleotides which can be of fundamental for clinical and therapeutic use.

## References

1. Alemu Belachew W, Naafs B. Position statement: LEPROSY: Diagnosis, treatment and follow-up. *J Eur Acad Dermatol Venereol*. 2019;33(7):1205-13.
2. Maymone MBC, Laughter M, Venkatesh S, Dacso MM, Rao PN, Stryjewska BM, et al. Leprosy: Clinical aspects and diagnostic techniques. *J Am Acad Dermatol*. 2020;83(1):1-14.
3. Reibel F, Cambau E, Aubry A. Update on the epidemiology, diagnosis, and treatment of leprosy. *Med Mal Infect*. 2015;45(9):383-93.
4. Lu TX, Rothenberg ME. MicroRNA. *J Allergy Clin Immunol*. 2018;141(4):1202-1207.
5. Liu PT, Wheelwright M, Teles R, Komisopoulou E, Edfeldt K, Ferguson B, et al, MicroRNA-21 targets the vitamin D-dependent antimicrobial pathway in leprosy. *Nat Med*. 2012;18(2):267-73.
6. Singh PK, Singh AV, Chauhan DS. Current understanding on micro RNAs and its regulation in response to Mycobacterial infections. *J Biomed Sci*. 2013;20(1):14.
7. Global leprosy update, 2014: need for early case detection. *Wkly Epidemiol Rec*. 2015; 90(36):461-74.
8. Ridley DS, Jopling WH. Classification of leprosy according to immunity. A five-group system. *Int J Lepr Other Mycobact Dis*. 1966; 34(3):255-73.
9. Ajit SK. Circulating microRNAs as biomarkers, therapeutic targets, and signaling molecules. *Sensors (Basel)*. 2012;12(3):3359-69.
10. Soares CT, Trombone APF, Fachin LRV, Rosa PS, Ghidella CC, Ramalho RF, et al. Differential Expression of MicroRNAs in Leprosy Skin Lesions. *Front Immunol*. 2017;8:1035.
